# Supplementary material for: Hydrodeoxygenation of sulfoxides into sulfides under mild conditions over a heterogeneous cobalt catalyst
Source: Royal Society of Chemistry journal article supplement (doi:10.1039/d1re00082a), 2021-01-01
Supplement: d1re00082a1.pdf [file d1re00082a1.pdf]

## Supporting information

### **Hydrodeoxygenation of sulfoxides into sulfides under mild conditions over a heterogeneous cobalt catalyst**

*Yanxin Wang,<sup>a</sup> Kaiyue Yao,<sup>a</sup> Duanjian Tao,<sup>\*b</sup> Nian Xiang,<sup>a</sup> Wei Wang,<sup>a</sup> and Zehui Zhang<sup>\*a</sup>*

<sup>a</sup> Key Laboratory of Catalysis and Materials Sciences of Hubei, South-Central University for Nationalities, Wuhan, 430074, China.

<sup>b</sup> College of Chemistry and Chemical Engineering, Jiangxi Normal University, Nanchang, 330022, China.

\* Corresponding author:

Duanjian Tao: E-mail: djtao@jxnu.edu.cn

Zehui Zhang: E-mail: zehuizh@mail.ustc.edu.cn

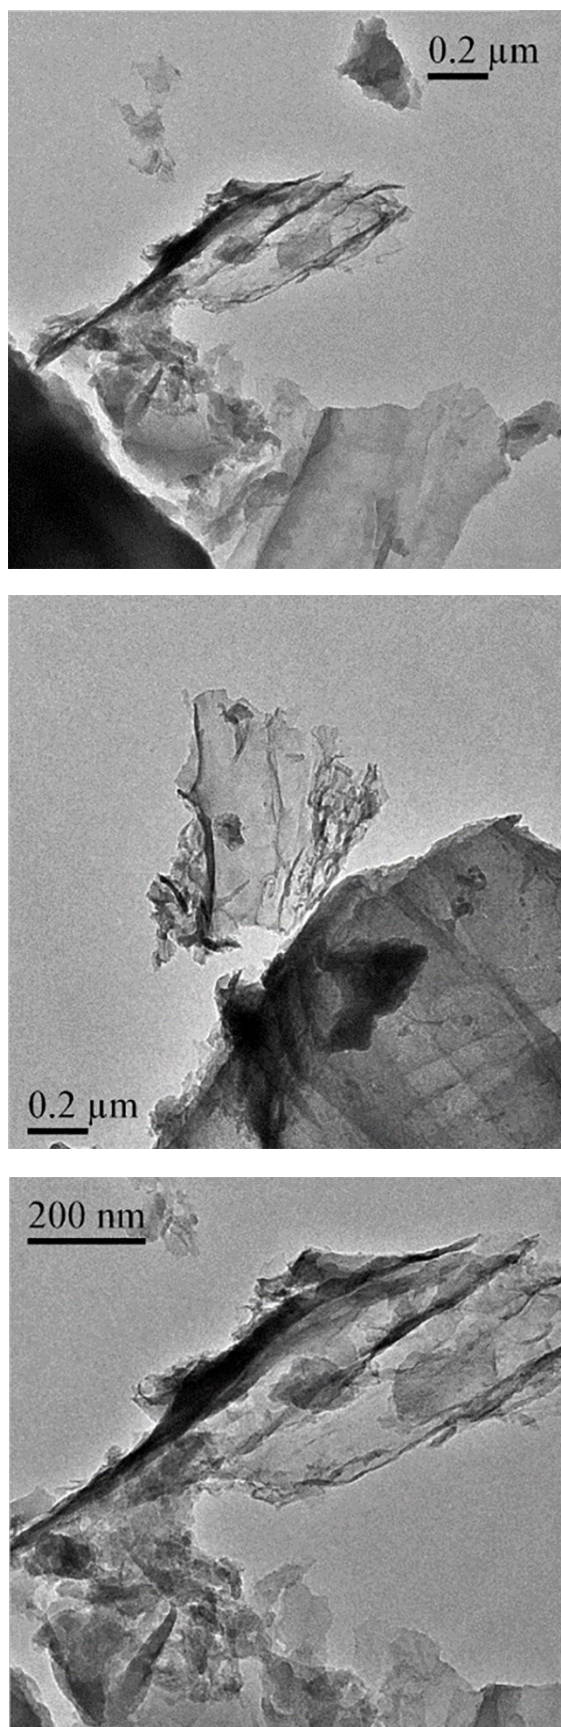

**Figure S1.** TEM images of the Co-NC/Al<sub>2</sub>O<sub>3</sub>-400 catalyst.

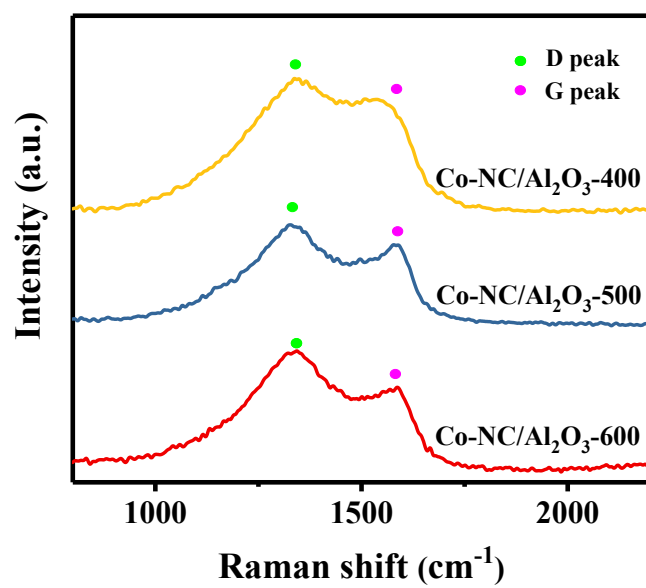

**Figure S2.** Raman spectra of the Co-NC/Al<sub>2</sub>O<sub>3</sub>-400, Co-NC/Al<sub>2</sub>O<sub>3</sub>-500 and Co-NC/Al<sub>2</sub>O<sub>3</sub>-600 catalysts.

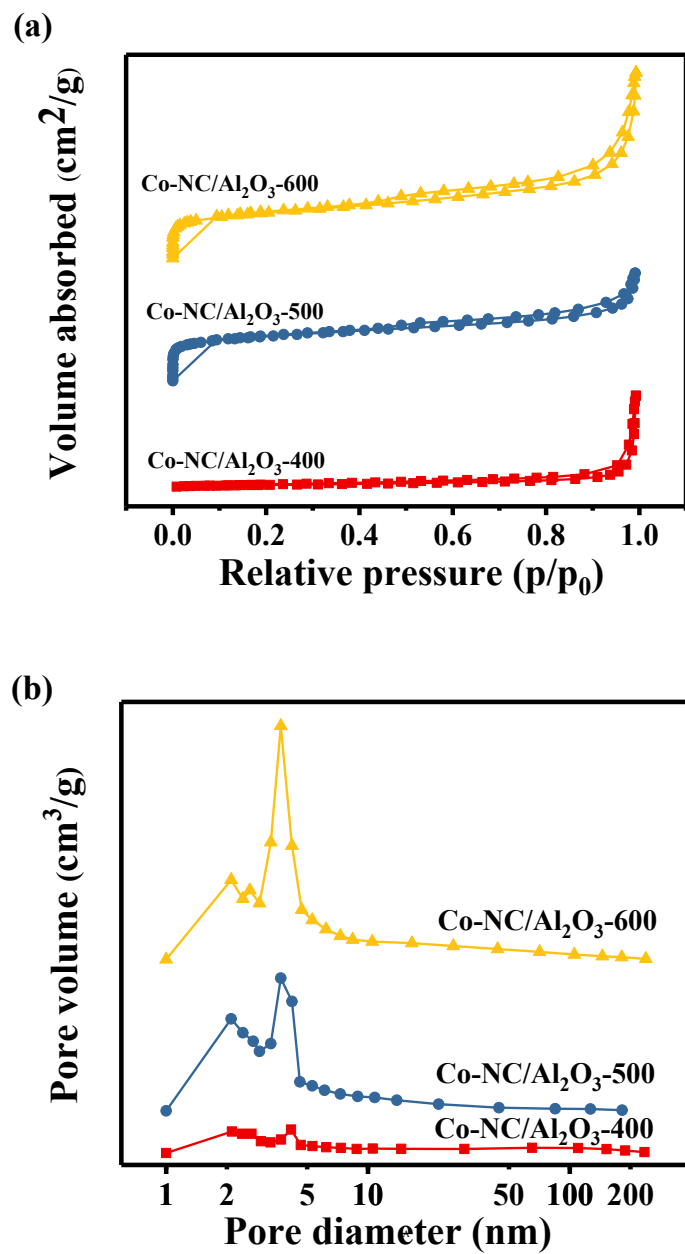

**Figure S3.**  $\text{N}_2$ -Sorption isotherm curves (a) and pore size distributions (b) of the Co-NC/ $\text{Al}_2\text{O}_3$ -T catalysts.

**Table S1.** The texture properties of the as-prepared catalysts.

| Catalyst                                  | Surface area<br>(m <sup>2</sup> g <sup>-1</sup> ) | Pore size<br>(nm) | Pore volume<br>(cm <sup>3</sup> g <sup>-1</sup> ) |
|-------------------------------------------|---------------------------------------------------|-------------------|---------------------------------------------------|
| Co-NC/Al <sub>2</sub> O <sub>3</sub> -400 | 23.03                                             | 2.04              | 0.20                                              |
| Co-NC/Al <sub>2</sub> O <sub>3</sub> -500 | 274.11                                            | 2.06              | 0.16                                              |
| Co-NC/Al <sub>2</sub> O <sub>3</sub> -600 | 280.37                                            | 2.05              | 0.34                                              |

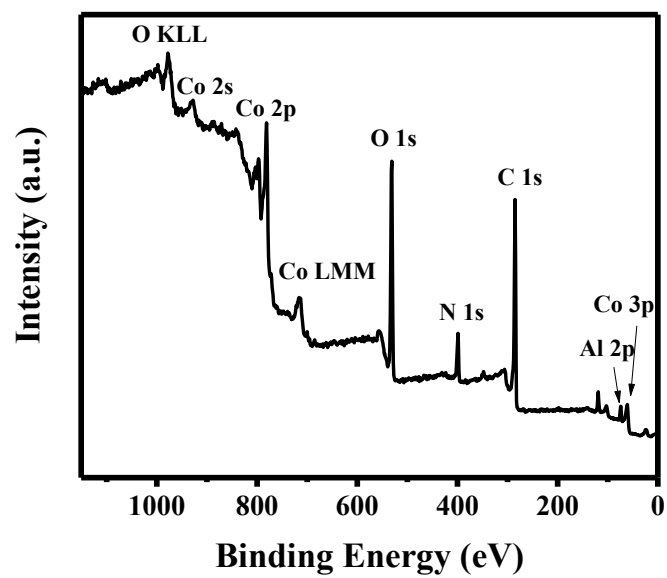

**Figure S4.** XPS survey scan of the Co-NC/Al<sub>2</sub>O<sub>3</sub>-500 catalyst.

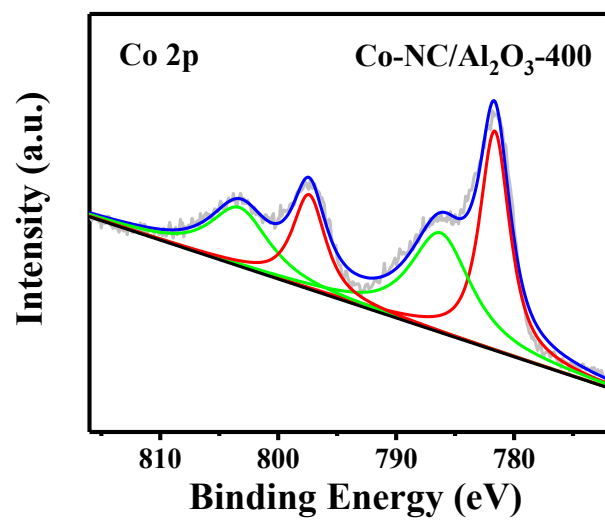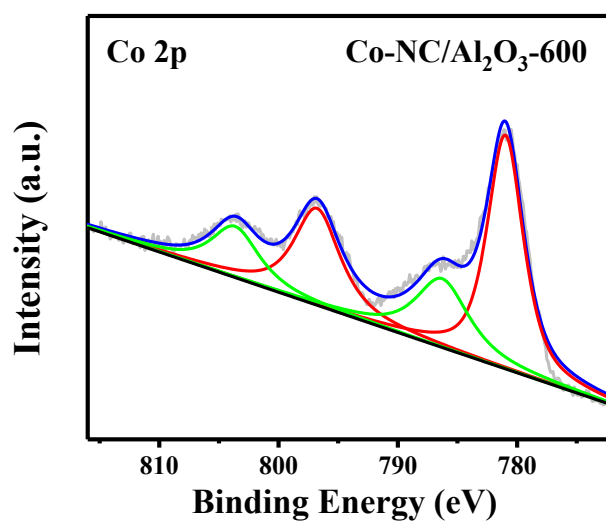

**Figure S5.** XPS spectra of Co 2p in the Co-NC/Al<sub>2</sub>O<sub>3</sub>-400 and Co-NC/Al<sub>2</sub>O<sub>3</sub>-600 catalysts.

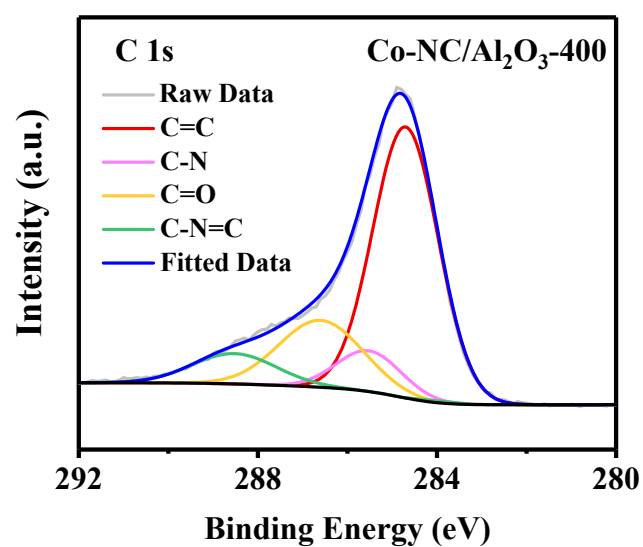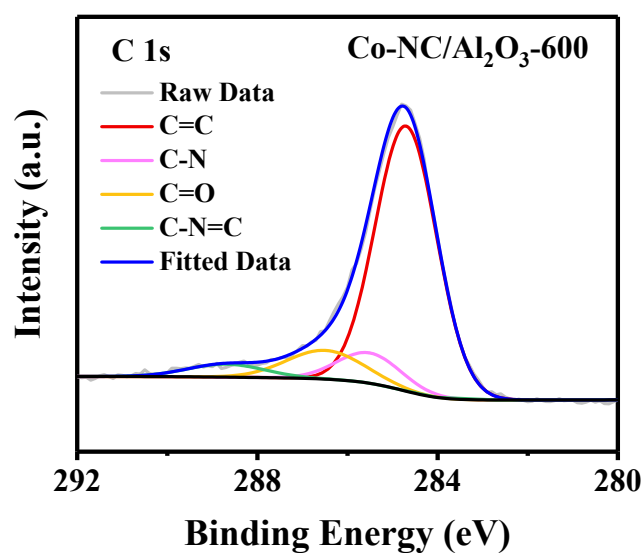

**Figure S6.** XPS spectra of C 1s in the Co-NC/Al<sub>2</sub>O<sub>3</sub>-400 and Co-NC/Al<sub>2</sub>O<sub>3</sub>-600 catalysts.

**Table S2.** The percentage of the different carbon in C 1s spectra.

| Catalyst                                  | C=C   | C-N   | C=O   | C-N=C |
|-------------------------------------------|-------|-------|-------|-------|
| Co-NC/Al <sub>2</sub> O <sub>3</sub> -400 | 62.2% | 9.2%  | 19.7% | 8.9%  |
| Co-NC/Al <sub>2</sub> O <sub>3</sub> -500 | 70.2% | 11.4% | 11.7% | 6.7%  |
| Co-NC/Al <sub>2</sub> O <sub>3</sub> -600 | 76.1% | 9.0%  | 10.3% | 4.6%  |

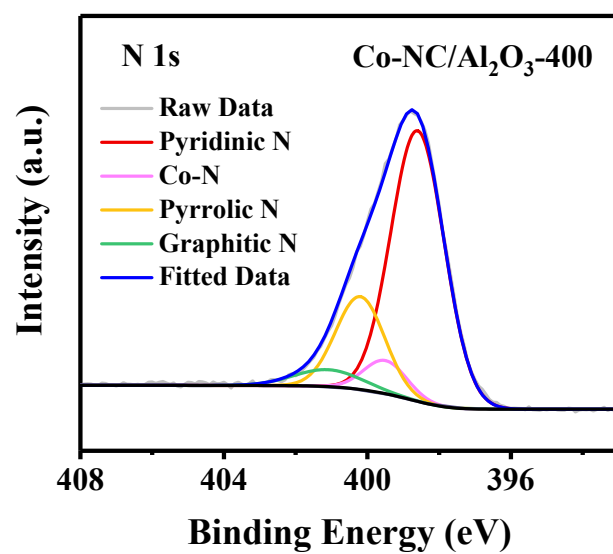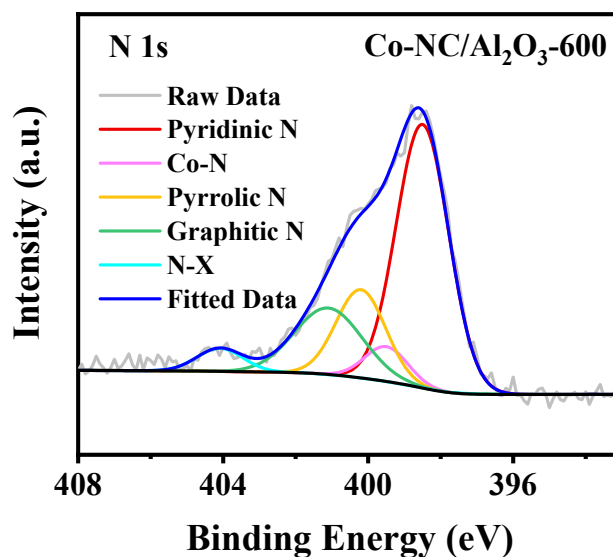

**Figure S7.** XPS spectra of N 1s in the Co-NC/Al<sub>2</sub>O<sub>3</sub>-400 and Co-NC/Al<sub>2</sub>O<sub>3</sub>-600 catalysts.

**Table S3.** The percentage of the different nitrogen in N 1s spectra and N content in the catalysts.

| Catalyst                                  | Pyridinic N | Co-N | Pyrrolic N | Graphitic N | N-X  | N (at. %) |
|-------------------------------------------|-------------|------|------------|-------------|------|-----------|
| Co-NC/Al <sub>2</sub> O <sub>3</sub> -400 | 67.1%       | 6.5% | 21.1%      | 5.3%        | 0    | 17.4%     |
| Co-NC/Al <sub>2</sub> O <sub>3</sub> -500 | 58.4%       | 6.6% | 17.5%      | 15.1%       | 2.4% | 8.24%     |
| Co-NC/Al <sub>2</sub> O <sub>3</sub> -600 | 54.8%       | 5.9% | 17.3%      | 17.9%       | 4.1% | 5.43%     |

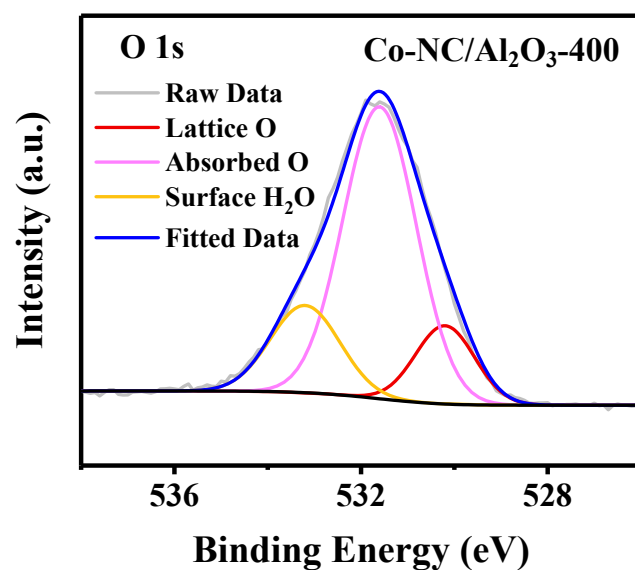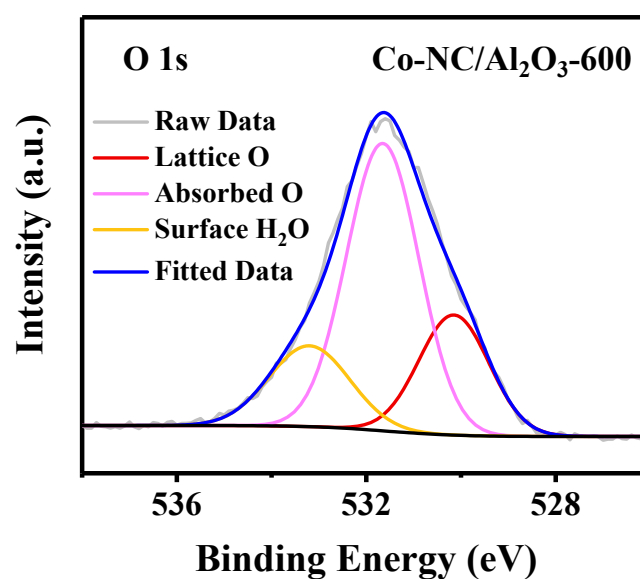

**Figure S8.** XPS spectra of O 1s in the Co-NC/Al<sub>2</sub>O<sub>3</sub>-400 and Co-NC/Al<sub>2</sub>O<sub>3</sub>-600 catalysts.

**Table S4.** The percentage of the different nitrogen in O 1s spectra in the catalysts.

| Catalyst                                  | Lattice O | Absorbed O | Surface H <sub>2</sub> O |
|-------------------------------------------|-----------|------------|--------------------------|
| Co-NC/Al <sub>2</sub> O <sub>3</sub> -400 | 14.5%     | 66.7%      | 18.8%                    |
| Co-NC/Al <sub>2</sub> O <sub>3</sub> -500 | 27.8%     | 58.2%      | 13.9%                    |
| Co-NC/Al <sub>2</sub> O <sub>3</sub> -600 | 23.6%     | 58.2%      | 18.2%                    |

**Table S5.** The comparison between other non-noble metal catalysts and Co-NC/Al<sub>2</sub>O<sub>3</sub>-500 catalyst.

| Entry | Catalyst                          | Condition                                          | Comparison                                                                                      | Ref.                                                    |
|-------|-----------------------------------|----------------------------------------------------|-------------------------------------------------------------------------------------------------|---------------------------------------------------------|
| 1     | Fe <sub>2</sub> (CO) <sub>9</sub> | Silane, 100 °C, 24 h                               | Use of high-cost reduction agent, long reaction time, hard to separate production and catalyst. | <i>ChemCatChem</i> , 2011, <b>3</b> , 666-670.          |
| 2     | Zn(OTf) <sub>2</sub>              | Silane, 100 °C, 24 h                               | Use of high-cost reduction agent, long reaction time, hard to separate production and catalyst. | <i>Catal. Sci. Technol.</i> , 2011, <b>1</b> , 104-110. |
| 3     | Mo@C                              | Alcohol as hydrogen source, 120 °C, 3 h            | Complex synthesis procedure.                                                                    | <i>ChemCatChem</i> , 2019, <b>11</b> , 4139-4146.       |
| 4     | Fe powder                         | H <sub>2</sub> O and CO <sub>2</sub> , 80 °C, 10 h | Fe was consumed during the reaction and large amount of catalyst was required.                  | <i>Green Chem.</i> , 2013, <b>15</b> , 1274-1279.       |
| 5     | Co-Mo/NC                          | 10 bar H <sub>2</sub> , 80 °C                      | Green and accessible molecular H <sub>2</sub> was used but complex synthesis                    | <i>Green Chem.</i> , 2020, <b>22</b> , 39-43.           |

|   |                                               |                                                    |                                                                                             |                                                       |
|---|-----------------------------------------------|----------------------------------------------------|---------------------------------------------------------------------------------------------|-------------------------------------------------------|
|   |                                               |                                                    | procedure.                                                                                  |                                                       |
| 6 | TiO <sub>2</sub>                              | >300 nm<br>photocatalyzed,<br>120 min              | (COOH) <sub>2</sub> was added<br>as hole scavengers.                                        | <i>Catal. Commun.</i> ,<br>2014, <b>54</b> , 100-103. |
| 7 | Cu(acac) <sub>2</sub>                         | Ph <sub>2</sub> SiH <sub>2</sub> , 100<br>°C, 12 h | Use of high-cost<br>reduction agent, long<br>reaction time                                  | <i>Catal. Lett.</i> ,<br>2011, <b>141</b> , 833-838.  |
| 8 | NbCl <sub>5</sub> &Zn                         | THF/PhH, 23<br>°C, 1-24 h                          | Use of toxic benzene<br>but mild condition.                                                 | <i>Tetrahedron</i> ,<br>2009, <b>65</b> , 2966-2974.  |
| 9 | Co-NC/Al <sub>2</sub> O <sub>3</sub> -<br>500 | 10 bar H <sub>2</sub> , 80<br>°C, 2 h              | Green and accessible<br>molecular H <sub>2</sub> was<br>used, facile<br>preparation method. | This work                                             |
